# Supplementary material for: Characterization of MicroRNA-200 pathway in ovarian cancer and serous intraepithelial carcinoma of fallopian tube
Source: Springer Nature journal article supplement (doi:10.1186/s12885-017-3417-z), 2017-06-17
Supplement: MOESM1 [file 12451390]

# **Supplemental Information**

**One Supplemental Figure and  
Five Supplemental Tables**

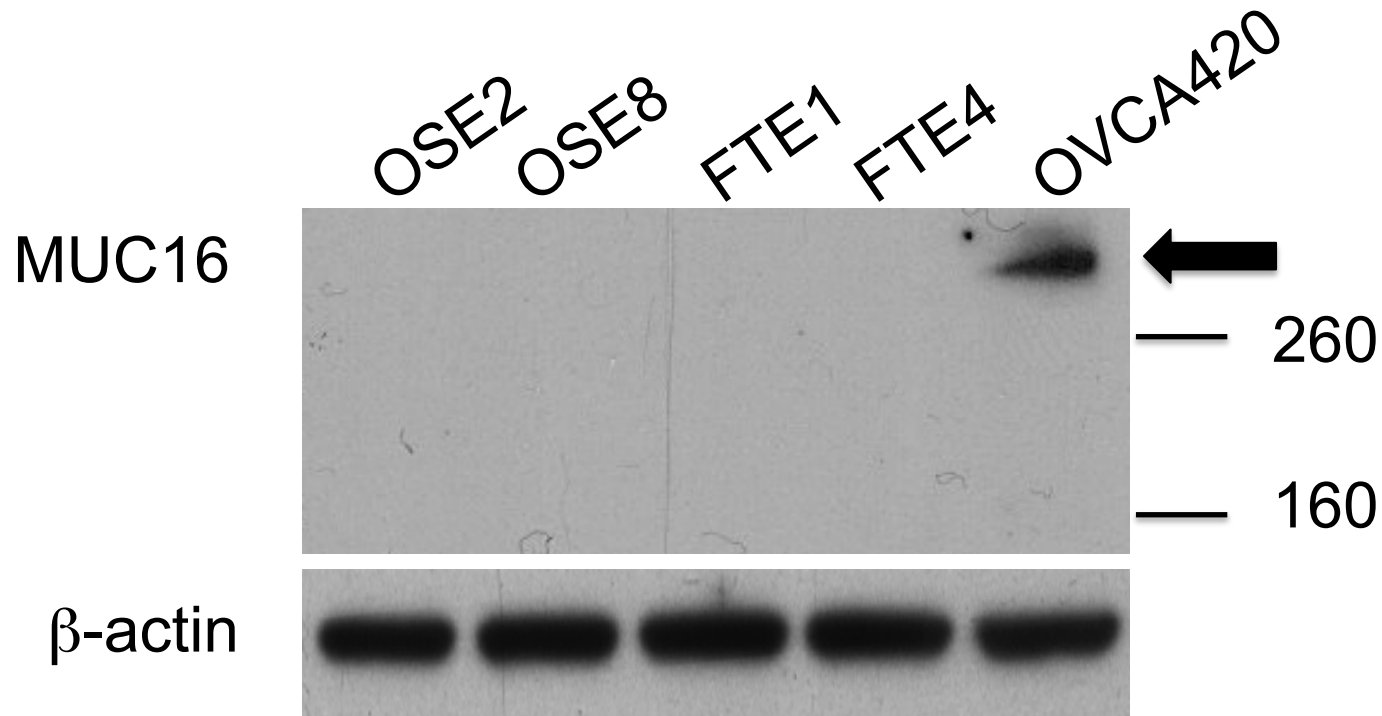

**Figure S1. Western blot analysis to show negligible expression of CA125 (MUC16) in OSE and FTE primary cultures.**

OVCA420 cancer cell line was used as the reference for MUC16 expression (block arrow).  $\beta$ -actin was used as loading control.

Table S1. Correlation analyses for the relationship between expression levels of miR-200 family and miR-205 and target genes.

|                              | miR-200a | miR-200b | miR-200c | miR-141 | miR-429 | miR-205 | ZEB1    | ZEB2    | TGFB1  | TGFB2   |
|------------------------------|----------|----------|----------|---------|---------|---------|---------|---------|--------|---------|
| miR-200a Pearson Correlation | 1        | .863**   | .726**   | .866**  | .889**  | .329**  | -.268*  | -.246*  | -.178  | -.242*  |
| Sig. (2-tailed)              |          | .000     | .000     | .000    | .000    | .003    | .015    | .027    | .111   | .029    |
| miR-200b Pearson Correlation | .863**   | 1        | .834**   | .711**  | .757**  | .520**  | -.474** | -.464** | -.208  | -.297** |
| Sig. (2-tailed)              | .000     |          | .000     | .000    | .000    | .000    | .000    | .000    | .062   | .007    |
| miR-200c Pearson Correlation | .726**   | .834**   | 1        | .750**  | .666**  | .491**  | -.409** | -.369** | -.281* | -.307** |
| Sig. (2-tailed)              | .000     | .000     |          | .000    | .000    | .000    | .000    | .001    | .011   | .005    |
| miR-141 Pearson Correlation  | .866**   | .711**   | .750**   | 1       | .886**  | .330**  | -.204   | -.180   | -.235* | -.211   |
| Sig. (2-tailed)              | .000     | .000     | .000     |         | .000    | .003    | .067    | .107    | .035   | .058    |
| miR-429 Pearson Correlation  | .889**   | .757**   | .666**   | .886**  | 1       | .397**  | -.294** | -.295** | -.167  | -.244*  |
| Sig. (2-tailed)              | .000     | .000     | .000     | .000    |         | .000    | .008    | .007    | .136   | .028    |
| miR-205 Pearson Correlation  | .329**   | .520**   | .491**   | .330**  | .397**  | 1       | -.529** | -.483** | -.012  | -.254*  |
| Sig. (2-tailed)              | .003     | .000     | .000     | .003    | .000    |         | .000    | .000    | .919   | .022    |
| ZEB1 Pearson Correlation     | -.268*   | -.474**  | -.409**  | -.204   | -.294** | -.529** | 1       | .709**  | .507** | .537**  |
| Sig. (2-tailed)              | .015     | .000     | .000     | .067    | .008    | .000    |         | .000    | .000   | .000    |
| ZEB2 Pearson Correlation     | -.246*   | -.464**  | -.369**  | -.180   | -.295** | -.483** | .709**  | 1       | .356** | .301**  |
| Sig. (2-tailed)              | .027     | .000     | .001     | .107    | .007    | .000    | .000    |         | .001   | .006    |
| TGFB1 Pearson Correlation    | -.178    | -.208    | -.281*   | -.235*  | -.167   | -.012   | .507**  | .356**  | 1      | .582**  |
| Sig. (2-tailed)              | .111     | .062     | .011     | .035    | .136    | .919    | .000    | .001    |        | .000    |
| TGFB2 Pearson Correlation    | -.242*   | -.297**  | -.307**  | -.211   | -.244*  | -.254*  | .537**  | .301**  | .582** | 1       |
| Sig. (2-tailed)              | .029     | .007     | .005     | .058    | .028    | .022    | .000    | .006    | .000   |         |

N=81 for all. \*\*. Correlation is significant at the 0.01 level (2-tailed). \*. Correlation is significant at the 0.05 level (2-tailed).

Correlation coefficients that are  $\geq 4$  are highlighted in red, whereas the correlation coefficients that are  $\leq -4.0$  are highlighted in blue.



**Table S3: Differential expression of effector gene *MUC16* in different subtypes of ovarian tumors**

| Effector gene | Ovarian cancer cells       |                                                                        |                   |                   |
|---------------|----------------------------|------------------------------------------------------------------------|-------------------|-------------------|
|               | Overall<br><i>P</i> -value | Clear cell                                                             | Endometrioid      | Serous            |
|               |                            | Difference in medians against Mucinous cancer cells ( <i>P</i> -value) |                   |                   |
| MUC16         | <0.016 <sup>†</sup>        | 7.979<br>(0.858)                                                       | 7.819<br>(0.024*) | 6.911<br>(0.012*) |

<sup>†</sup> significant at the 0.05 level by Kruskal Wallis test

\* significant at the 0.05 level by Mann-Whitney test (corrected using the Bonferroni method for multiple comparisons)

**Table S4: Effects of microRNA on target gene expression in OSE and FTE cells**

|                        | MicroRNA                           |          |          |         |         |                  |                    |                   |                      |
|------------------------|------------------------------------|----------|----------|---------|---------|------------------|--------------------|-------------------|----------------------|
|                        | miR-200a                           | miR-200b | miR-200c | miR-141 | miR-429 | miR-205          | miR-200b + miR-205 | miR-141 + miR-205 | Five miR-200 members |
| Overall effect (OSE)   | -1.010                             | -0.782   | -0.452   | -0.468  | -0.629  | -0.133           | -0.472             | -0.534            | -0.587               |
| <i>P</i> -value† (OSE) | <0.001*                            | <0.001*  | 0.029*   | 0.022*  | 0.001*  | 0.935            | 0.021*             | 0.007*            | 0.003*               |
| Overall effect (FTE)   | -0.419                             | -0.512   | -0.578   | -0.047  | -0.454  | 0.156            | -0.031             | -0.088            | -0.360               |
| <i>P</i> -value† (FTE) | 0.340                              | 0.163    | 0.090    | 1.000   | 0.261   | 0.986            | 1.000              | 1.000             | 0.499                |
| Target gene            | Estimated marginal mean expression |          |          |         |         | <i>P</i> -value‡ |                    |                   |                      |
| ZEB1 (OSE)             | -0.389                             |          |          |         |         | <0.001*          |                    |                   |                      |
| ZEB2 (OSE)             | -0.854                             |          |          |         |         | <0.001*          |                    |                   |                      |
| TGFB1 (OSE)            | -0.338                             |          |          |         |         | <0.001*          |                    |                   |                      |
| TGFB2 (OSE)            | -0.449                             |          |          |         |         | <0.001*          |                    |                   |                      |
| ZEB1 (FTE)             | -0.252                             |          |          |         |         | 0.016*           |                    |                   |                      |
| ZEB2 (FTE)             | -0.752                             |          |          |         |         | <0.001*          |                    |                   |                      |
| TGFB1 (FTE)            | -0.135                             |          |          |         |         | 0.183            |                    |                   |                      |
| TGFB2 (FTE)            | 0.204                              |          |          |         |         | 0.048*           |                    |                   |                      |

† *p*-value of Dunnett's test to compare each microRNA versus Controls (two-sided)

‡ *p*-value for testing mean expressions not equal to zero (two-sided)

\* significant at the 0.05 level

**Table S5: Effects of microRNA on effector gene expression in OSE and FTE**

|                        | MicroRNA                                 |          |                        |         |                                          |         |                        |                   |                      |
|------------------------|------------------------------------------|----------|------------------------|---------|------------------------------------------|---------|------------------------|-------------------|----------------------|
|                        | miR-200a                                 | miR-200b | miR-200c               | miR-141 | miR-429                                  | miR-205 | miR-200b + miR-205     | miR-141 + miR-205 | Five miR-200 members |
| Overall effect (OSE)   | 1.493                                    | 1.684    | 1.351                  | 0.935   | 0.835                                    | -0.286  | 1.276                  | 0.918             | 1.404                |
| <i>P</i> -value† (OSE) | <0.001*                                  | <0.001*  | <0.001*                | 0.023*  | 0.055                                    | 0.941   | 0.001*                 | 0.027*            | <0.001*              |
| Overall effect (FTE)   | 1.588                                    | 2.440    | 2.203                  | 1.798   | 2.540                                    | 0.412   | 0.772                  | 1.945             | 2.519                |
| <i>P</i> -value† (FTE) | <0.001*                                  | <0.001*  | <0.001*                | <0.001* | <0.001*                                  | 0.763   | 0.127                  | <0.001*           | <0.001*              |
| Effector gene          | Estimated marginal mean expression (OSE) |          | <i>P</i> -value‡ (OSE) |         | Estimated marginal mean expression (FTE) |         | <i>P</i> -value‡ (FTE) |                   |                      |
| CDH1                   | 2.973                                    |          | <0.001*                |         | 2.565                                    |         | <0.001*                |                   |                      |
| CDH3                   | 1.981                                    |          | <0.001*                |         | 2.779                                    |         | <0.001*                |                   |                      |
| CRB3                   | 3.781                                    |          | <0.001*                |         | 5.337                                    |         | <0.001*                |                   |                      |
| LLGL2                  | 0.608                                    |          | 0.059                  |         | 0.875                                    |         | 0.011*                 |                   |                      |
| CLDN7                  | -0.016                                   |          | 0.960                  |         | 3.061                                    |         | <0.001*                |                   |                      |
| SFN                    | 1.856                                    |          | <0.001*                |         | 0.894                                    |         | 0.009*                 |                   |                      |
| PPL                    | 1.303                                    |          | <0.001*                |         | 0.774                                    |         | 0.024*                 |                   |                      |
| EVA1                   | 0.015                                    |          | 0.963                  |         | 0.614                                    |         | 0.072                  |                   |                      |
| EpCAM                  | 1.774                                    |          | <0.001*                |         | 1.946                                    |         | <0.001*                |                   |                      |
| TSPAN1                 | 1.744                                    |          | <0.001*                |         | 4.470                                    |         | <0.001*                |                   |                      |
| SCEL                   | 0.027                                    |          | 0.933                  |         | 0.411                                    |         | 0.227                  |                   |                      |

|         |        |         |        |         |
|---------|--------|---------|--------|---------|
| PKP3    | 0.847  | 0.009*  | 3.040  | <0.001* |
| TMEM30B | -0.624 | 0.053   | 0.627  | 0.066   |
| MAL2    | 1.468  | <0.001* | 0.830  | 0.015*  |
| MUC1    | 0.362  | 0.259   | 0.136  | 0.689   |
| CDH11   | -0.057 | 0.859   | -0.249 | 0.464   |
| OCLN    | 0.158  | 0.622   | 0.212  | 0.532   |
| PTAJ    | 1.237  | <0.001* | 0.549  | 0.107   |
| SH3YL1  | 0.503  | 0.118   | 0.309  | 0.363   |
| MUC16   | 0.163  | 0.611   | 4.496  | <0.001* |
| HE4     | 0.081  | 0.800   | 0.380  | 0.264   |

† p-values of Dunnett's test to compare each microRNA versus Controls (two-sided)

‡ p-values for testing mean expressions not equal to zero (two-sided)

\* significant at the 0.05 level
